# Supplementary material
Source: PubMed Central journal article supplement (PMC3088603)
Supplement: 1017672108_pnas.1017672108_SI.pdf [file 1017672108_pnas.1017672108_SI.pdf]

# Supporting Information

Hwang et al. 10.1073/pnas.1017672108

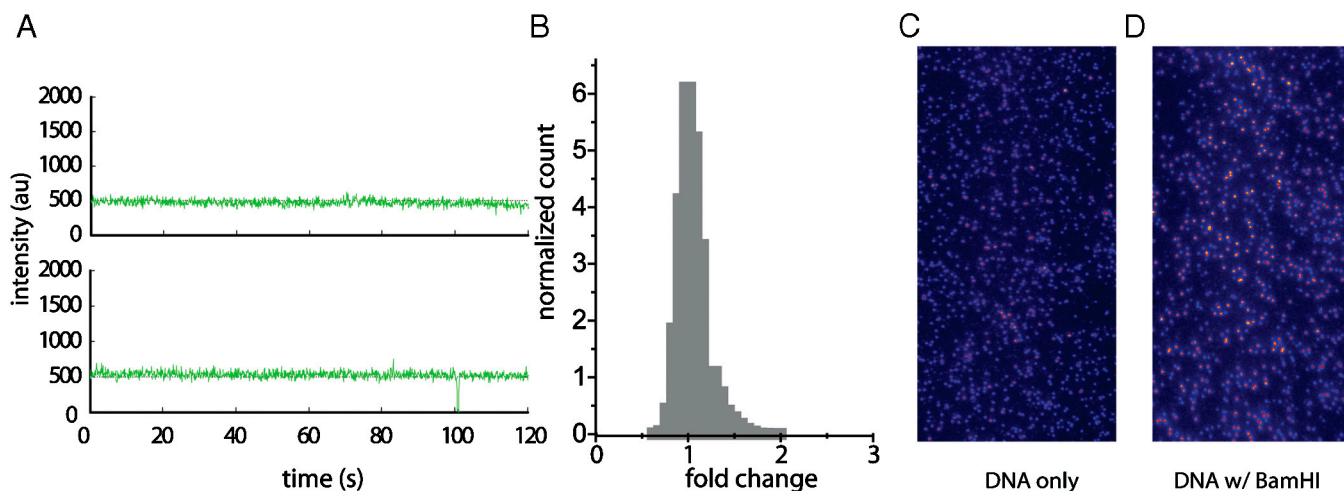

Fig. S1. (A) A representative DNA-only trace. More than 95% of molecules display a constant intensity without fluctuations as represented by the traces shown. (B) Histogram of cumulative intensity of 30 molecules ( $X_c = 1.04$ ). Intensity histograms are normalized to the unbound (lowest) peak intensity from each trace. In this case, there is only one peak. Refer to Fig. S2 for a more in-depth description of our analysis. Normalized count (the y-axis) is a count value that takes into account the length of the trace, so that every trace is weighted equally. (C) Image of the DNA construct with binding site 1 bp away from Cy3 end. (D) Image of the same DNA after addition of BamHI. Cy3 intensities become brighter.

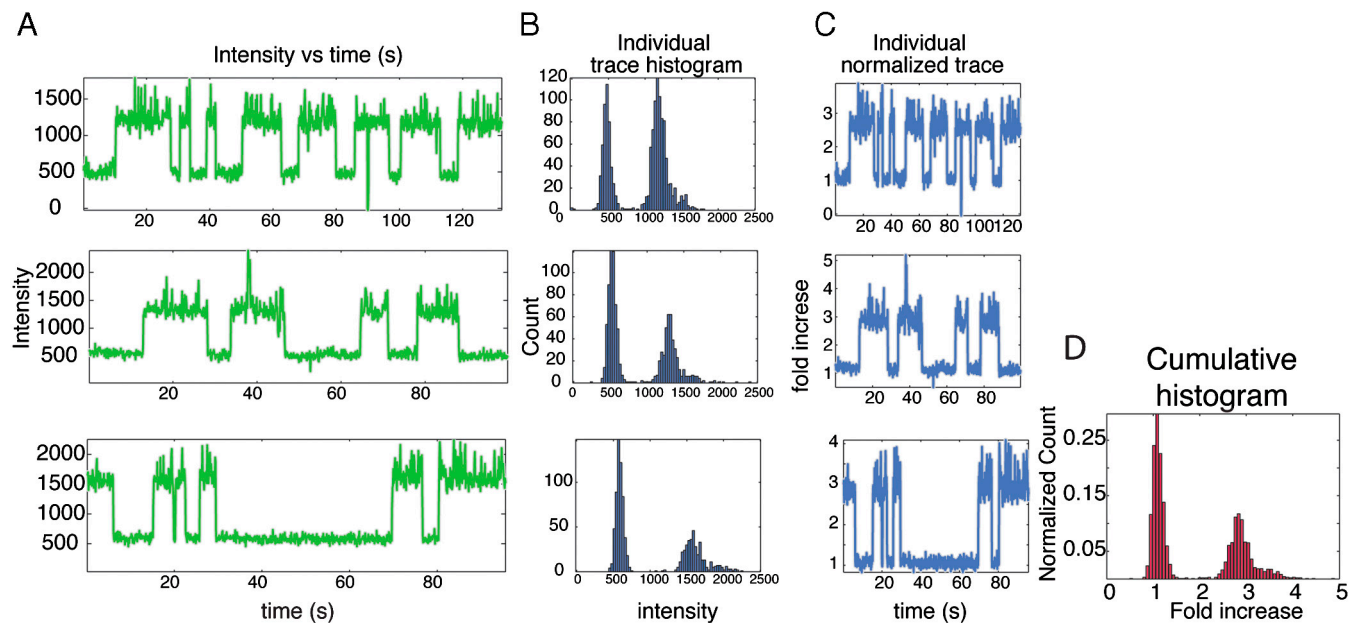

Fig. S2. Intensity normalization analysis. (A) Single-molecule traces that show binding and unbinding events are selected. (B) The intensities from the selected traces are used to build an intensity histogram for each trace. (C) The trace is normalized to the lower peak value, which represents the DNA-only intensity. (D) A cumulative histogram is formed based on all the selected traces in that folder. All data presented here are taken from the 1-bp-site data mentioned in Fig. 1B.

PIFE effect is independent of laser intensity and DNA sequence.

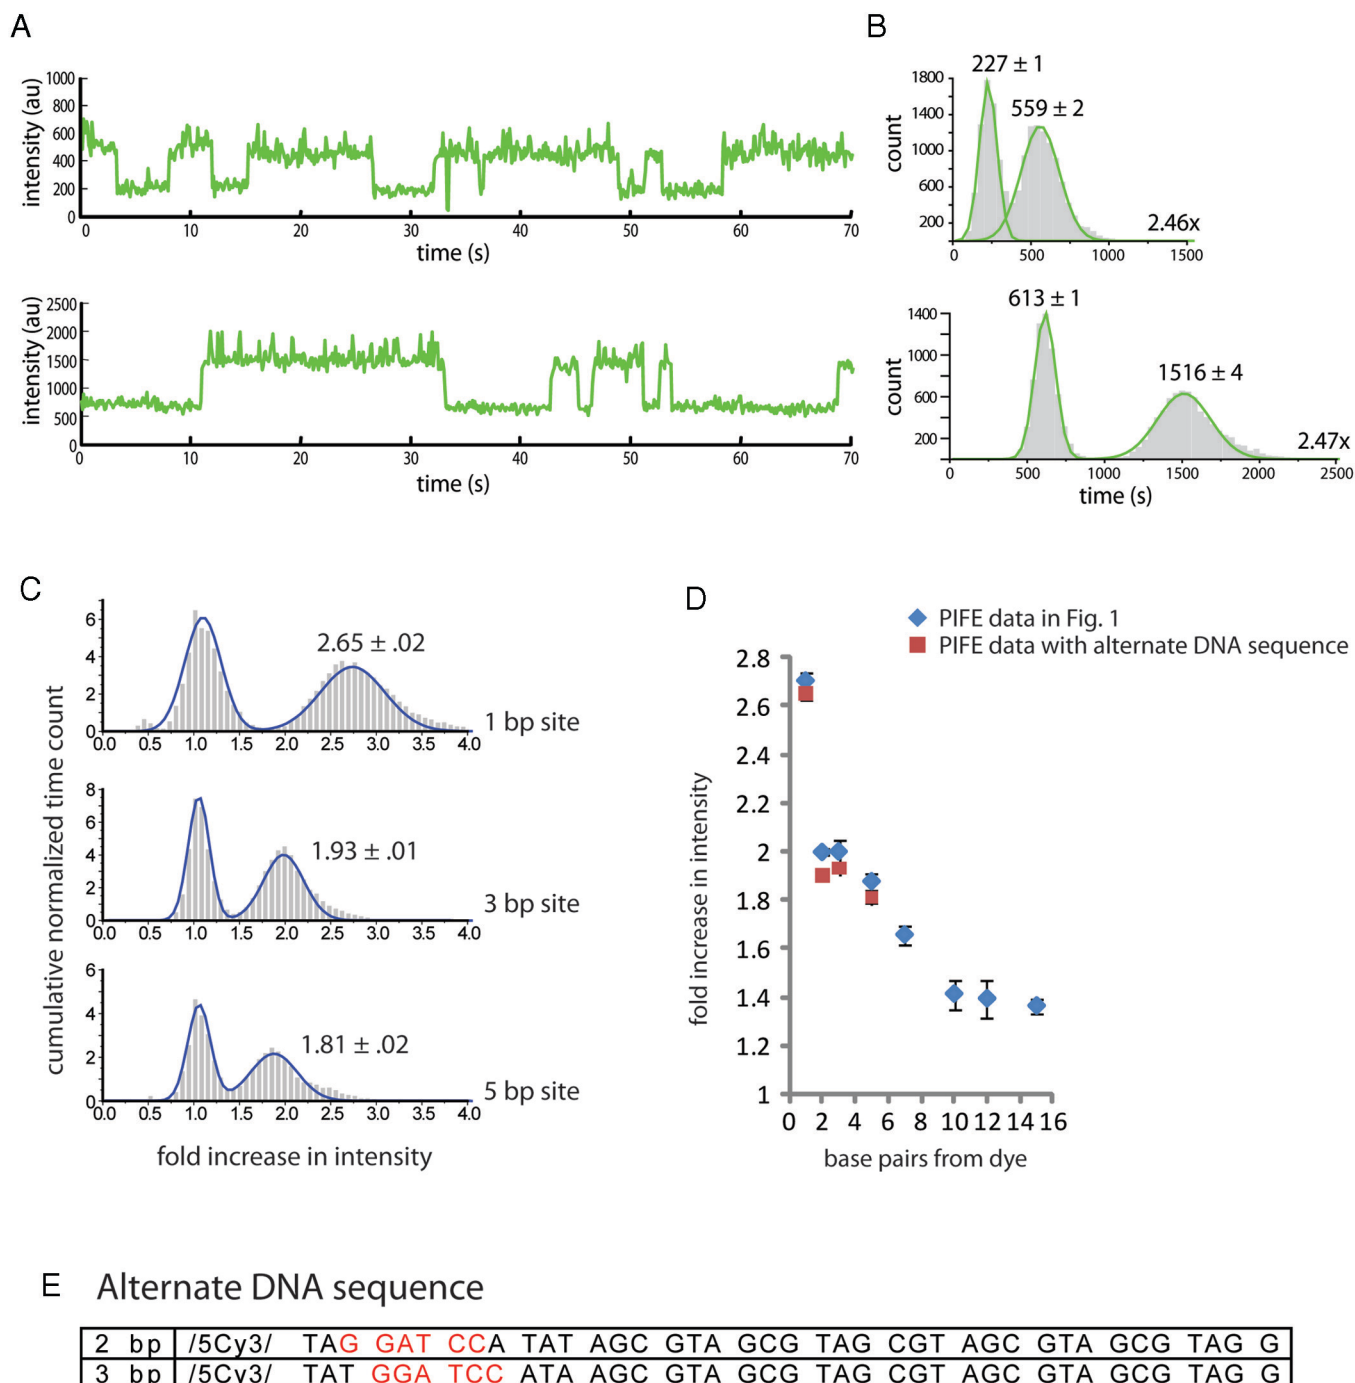

**Fig. S3.** PIFE effect is independent of laser intensity and DNA sequence. (A) Sample traces from 1-bp-site DNA after addition of BamHI from movies of low (top) and high (bottom) laser excitation levels. As expected, the overall intensity is substantially higher under the higher excitation (bottom). (B) Raw intensities are used to build histogram distributions. The intensity fold increase is about 2.5-fold regardless of the level of the excitation intensity. (C) Histograms built from PIFE experiment on DNAs that vary in sequence composition in the DNA regions outside of the recognition sequence as shown in (E). (D) The overlay of the PIFE data on Fig. 1D and the PIFE data on the alternate sequence shown in (E). (E) The alternate sequence designed for 2-bp and 3-bp DNA construct.
